# Supplementary material
Source: PubMed Central journal article supplement (PMC10541087)
Supplement: cd-22-0523_supplementary_fig.s3.pdf [file cd-22-0523_supplementary_fig.s3.pdf]

Supplementary Figure S3: Senescent cancer cells efficiently activate dendritic cells

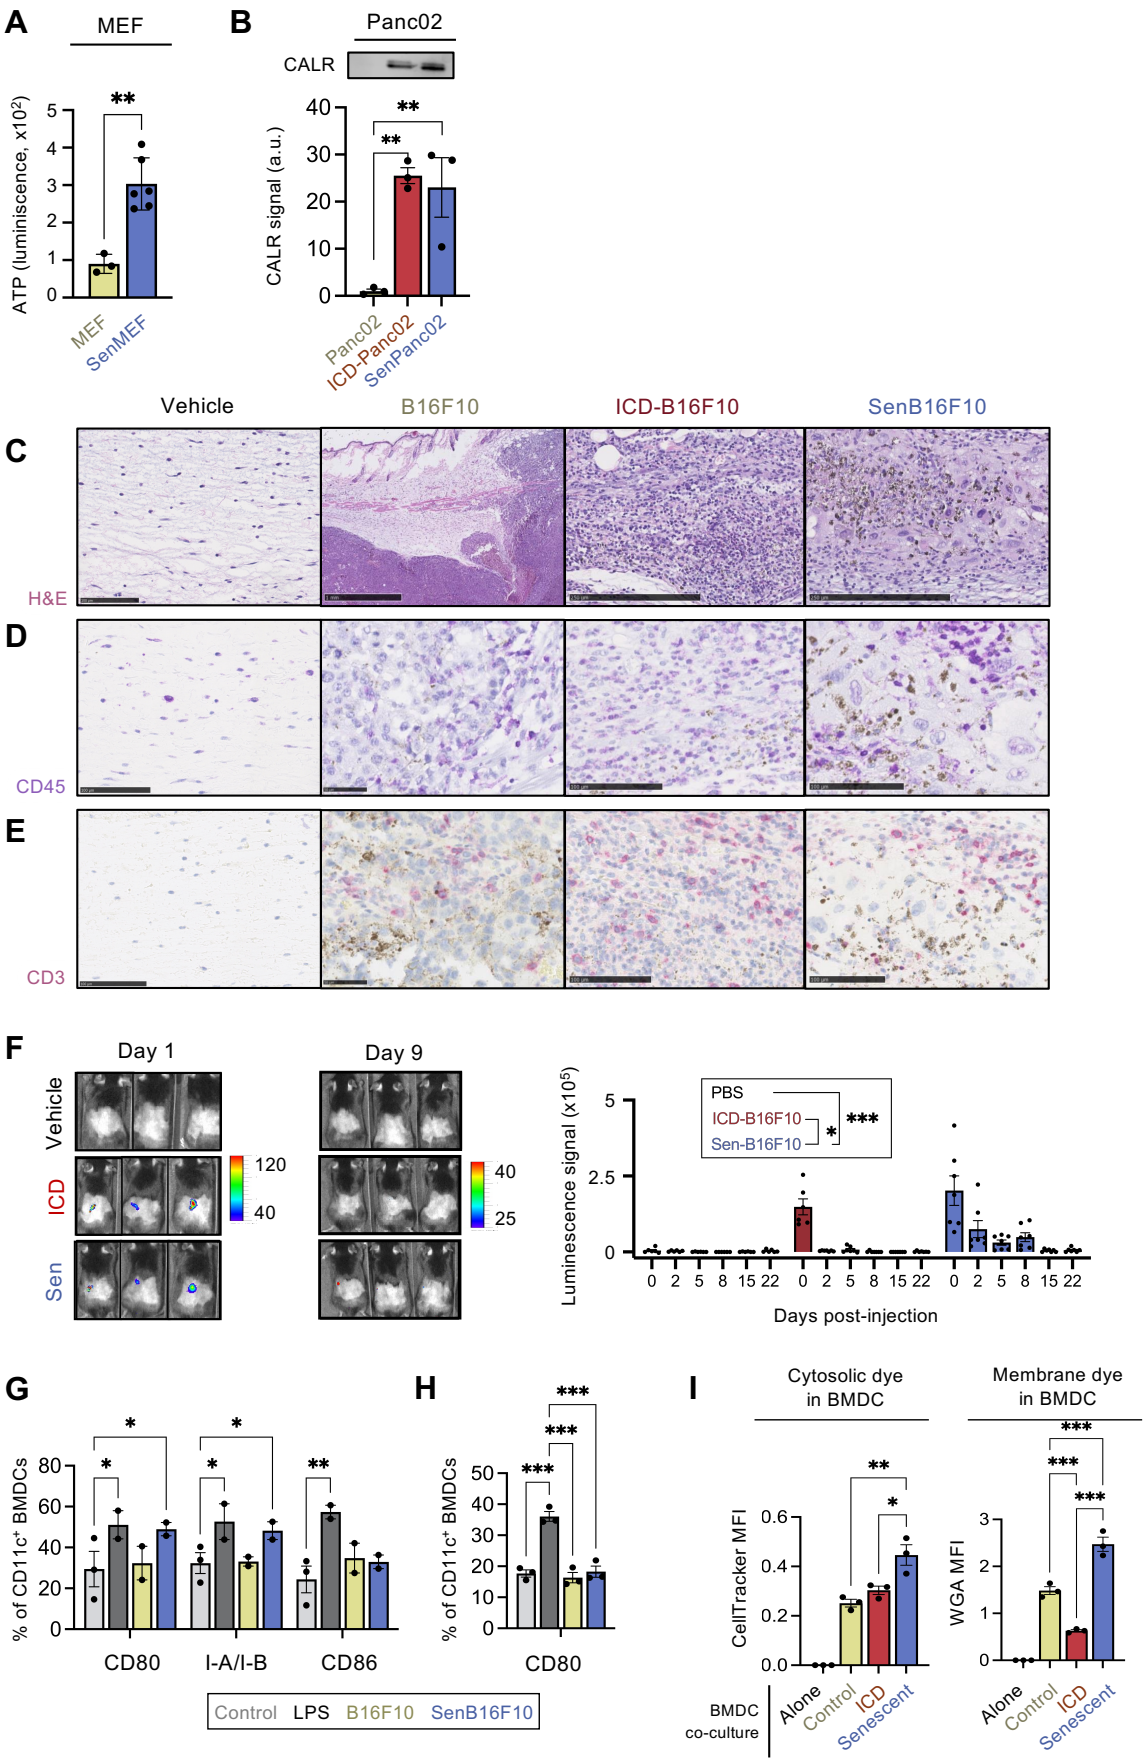

Supplementary Figure S3: Senescent cancer cells efficiently activate dendritic cells

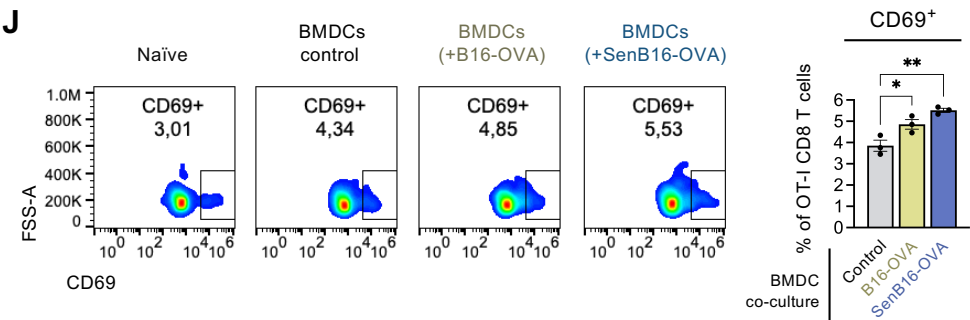

### Supplementary Figure S3: Senescent cancer cells efficiently activate dendritic cells

- A. Levels of extracellular ATP in the conditioned medium (CM) of  $10^6$  control MEF or senMEF.  $n=3$  independent experiments.  $**p<0.01$ ; unpaired Student's *t* test.
- B. Immunoblot detection of CALR in the CM of  $10^6$  control Panc02, ICD-Panc02 or senPanc02. Representative image (left panel) and quantification (right panel) of  $n=3$  independent experiments are shown.  $**p<0.01$ ; one-way ANOVA test compared to control Panc02 cells.
- C. Haematoxylin-eosin (H&E) in skin sections of animals after 7 days of subcutaneous injection of vehicle, control, ICD or senB16F10. Note that the brown pigmentation is due to the melanin. Representative images selected by a histopathologist of  $n=3-5$  animals per group are shown. Scale bars for each images are shown (100, 1000, 250, and 250  $\mu\text{m}$ , respectively).
- D. Immunohistochemistry of CD45<sup>+</sup> cells (purple) in skin sections of animals after 7 days of subcutaneous injection of vehicle, control, ICD or senB16F10. Note that the brown pigmentation is due to the melanin. Representative images selected by a histopathologist of  $n=5$  animals per group are shown. Scale bars for each images are shown (100  $\mu\text{m}$ ).
- E. Immunohistochemistry of CD3<sup>+</sup> cells (purple) in skin sections of animals 7 days after subcutaneous injection of vehicle, control, ICD or senB16F10. Note that the brown pigmentation is due to the melanin. Representative images selected by a histopathologist of  $n=5$  animals per group are shown. Scale bars for each images are shown (100  $\mu\text{m}$ ).
- F. *In vivo* imaging detection of luciferase-expressing B16F10 (B16-luc) in animals subcutaneously injected with vehicle,  $10^6$  ICD-B16-Luc or  $2 \times 10^5$  senB16-Luc ( $n=6-7$  per group) at different time points after subcutaneous injection (as indicated). Representative images (left panels) and quantification (right panel) are shown.  $***p<0.001$ ,  $**p<0.01$ ; two-way ANOVA test.
- G. Flow cytometry analysis of the DC activation markers CD80, CD86 and MHC-II (I-A/I-B) in CD11c<sup>+</sup> BMDCs upon co-culture with RPMI medium either alone or with LPS, B16F10 or senB16F10. Representative histograms and quantification of  $n=3$  biological replicates are shown.  $***p<0.001$ ,  $**p<0.01$ ;  $*p<0.05$ ; one-way ANOVA test.
- H. Flow cytometry analysis of the DC activation marker CD80 in CD11c<sup>+</sup> BMDCs upon co-culture with RPMI medium either alone or with LPS, B16F10 or senB16F10 using a transwell system. Representative histograms and quantification of  $n=3$  biological replicates are shown.  $***p<0.001$ ,  $**p<0.01$ ;  $*p<0.05$ ; one-way ANOVA test.
- I. Flow cytometry analysis of uptake of CFSE (cytosolic dye) or WGA-Alexa647 (membrane dye) by BMDCs from labeled control Panc02, ICD-Panc02 or senPanc02. Quantification after subtraction of autofluorescence from unstained BMDC of  $n=3$  biological replicates.  $***p<0.001$ ;  $**p<0.01$ ;  $*p<0.05$ , one-way ANOVA test.
- J. Flow cytometry analysis of OT-I CD8 T cells activation, as measured by CD69 expression, upon co-culture with RPMI medium either alone or with PMA+I, naïve BMDCs or BMDCs previously co-cultured with B16F10-OVA (B16-OVA) or with senB16F10-OVA (senB16OVA), as indicated. Representative histograms and quantification of  $n=3$  biological replicates are shown.  $***p<0.001$ ,  $**p<0.01$ ;  $*p<0.05$ ; one-way ANOVA test.
