# Supplementary material
Source: PubMed Central journal article supplement (PMC10541087)
Supplement: cd-22-0523_supplementary_fig.s4.pdf [file cd-22-0523_supplementary_fig.s4.pdf]

# **Supplementary Figure S4: Immunization with senescent cancer cells promotes anti-cancer immune surveillance**

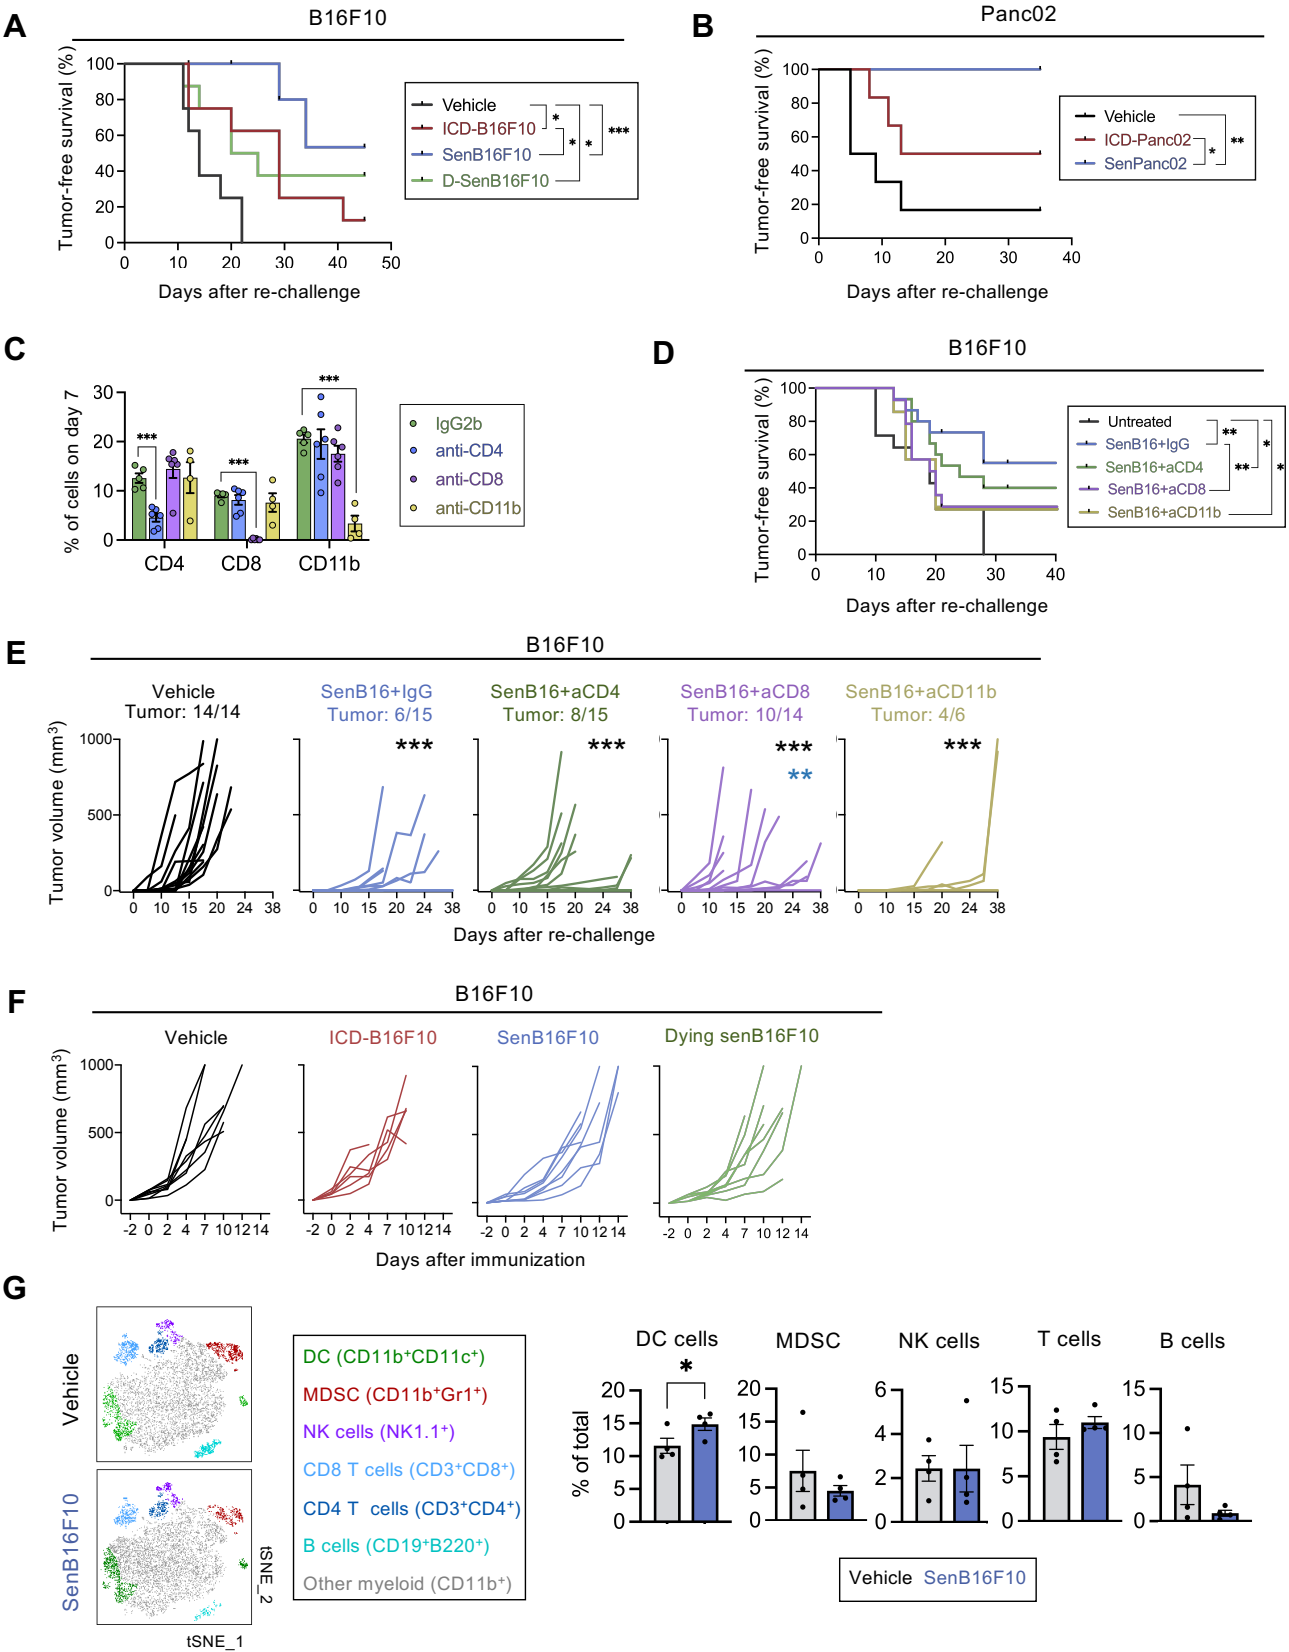

#### **Supplementary Figure S4 Immunization with senescent cancer cells promotes anti-cancer immune surveillance**

- A. Tumor-free survival in vehicle-treated mice or mice immunized with ICD-B16F10, senB16F10 or senB16F10 cells dying by senolysis induced by navitoclax (D-senB16F10) ( $n=8$  mice per group). \*\* $p<0.01$ , \* $p<0.05$ ; log-rank (Mantel-Cox) test.
- B. Tumor-free survival of vehicle-treated mice or mice immunized with ICD-Panc02 or senPanc02 ( $n=6$  mice per group). \*\* $p<0.01$ , \* $p<0.05$ ; log-rank (Mantel-Cox) test.
- C. Flow cytometry analysis of immune populations (CD4<sup>+</sup>, CD8<sup>+</sup> and CD11b<sup>+</sup> cells) in peripheral blood from animals treated with IgG or the indicated blocking antibodies after 7 days of immune depletions ( $n=4-6$  mice per group).
- D. Tumor-free survival of vehicle-treated mice ( $n=14$ ) or mice immunized with senB16F10 treated with IgG ( $n=14$ ) or the indicated blocking antibodies as described in Fig. 4D ( $n=15$  for aCD4,  $n=14$  for aCD8, or  $n=6$  for aCD11b). \*\* $p<0.01$ , \* $p<0.05$ ; log-rank (Mantel-Cox) test.
- E. Individual tumor growth curves from vehicle-treated mice ( $n=14$ ) or mice immunized with senB16F10 treated with IgG ( $n=14$ ) or the indicated blocking antibodies as described in Fig. 4D ( $n=15$  for aCD4,  $n=14$  for aCD8, or  $n=6$  for aCD11b). \*\* $p<0.01$ , \* $p<0.05$ ; two-way ANOVA test.
- F. Individual tumor growth of B16F10 tumor-bearing animals immunized with ICD-B16F10, dying senB16F10 or senB16F10. \* $p<0.05$ ; two-way ANOVA test ( $n=7-8$ ).
- G. tSNE representation of tumor-infiltrating immune (CD45<sup>+</sup>) cells detected by CyTOF of B16F10 tumors from animals immunized with vehicle or senB16F10 ( $n=4$  animals per group) highlighting the main immune populations detected (left panel) and quantification of the indicated immune populations in tumor-infiltrating immune cells (CD45<sup>+</sup>) cells from animals immunized with vehicle or senB16F10 (right panel) ( $n=4$  mice per group). \* $p<0.05$ ; unpaired Student's test.
